# Supplementary material for: Permafrost thaw couples slopes with downstream systems and effects propagate throughArctic drainage networks
Source: Copernicus journal article supplement (doi:10.5194/tc-2020-218), 2020-09-28
Supplement: Supplementary file 2 [file tc-2020-218-supplement.zip]

Archive with 2 entries (2 files):
- Supplement_tc-2020-2018_25SEPT2020/Supplement_tc-2020-218_25SEPT2020.pdf
- Supplement_tc-2020-2018_25SEPT2020/VideoS3_tc-2020-218_25SEPT2020.gif
