# Supplementary figures and images for: Permafrost thaw couples slopes with downstream systems and effects propagate throughArctic drainage networks
Source: Copernicus journal article supplement (doi:10.5194/tc-2020-218), 2020-09-28

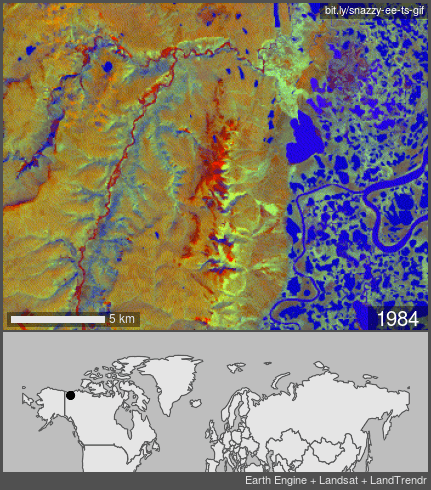

Supplement: Supplementary file 2 [file tc-2020-218-supplement.zip › Supplement_tc-2020-2018_25SEPT2020/VideoS3_tc-2020-218_25SEPT2020.gif]
